# Supplementary material
Source: Springer Nature journal article supplement (https://www.springermedizin.de/resource/supplementary/13053_2009_142_MOESM1_ESM.pdf/9674284)

**Any MMR mutation carriers**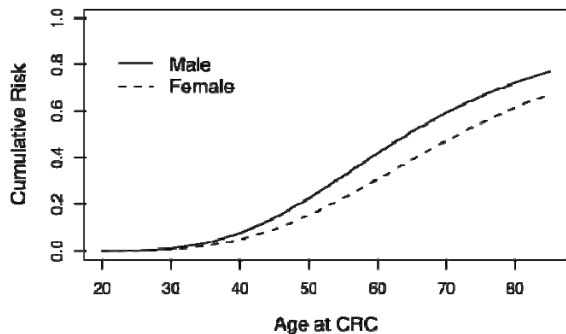**Any MMR mutation non-carriers**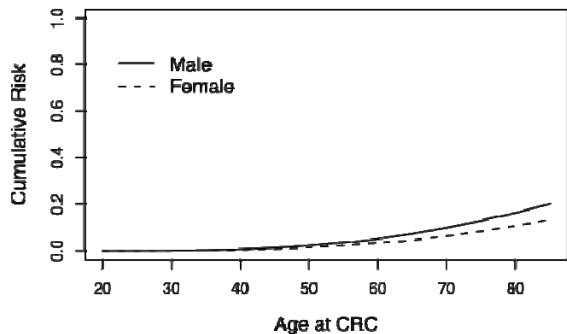**MSH2 mutation carriers**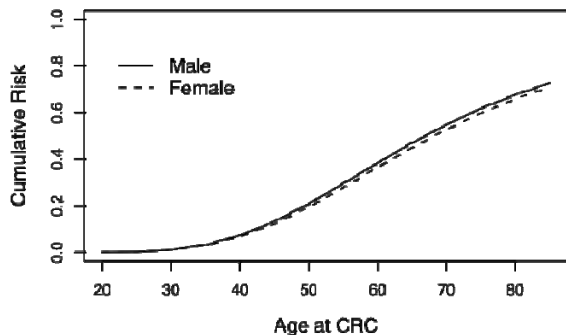**MLH1 mutation carriers**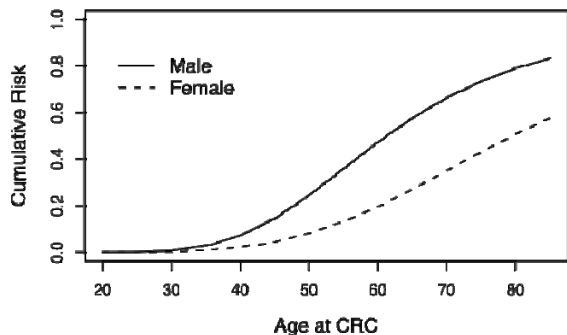

Supplement: MOESM1 [file 9674284]
